# Supplementary material for: "We’re Not Providing the Best Care If We Are Not on the Cutting Edge of Research": A Research Impact Evaluation at a Regional Australian Hospital and Health Service
Source: PubMed Central journal article supplement (PMC10105178; doi:10.34172/ijhpm.2022.6529), 2022-05-22
Supplement: ijhpm-11-3000-s001.pdf [file ijhpm-11-3000-s001.pdf]

**Article title:** “We’re Not Providing the Best Care If We Are Not on the Cutting Edge of Research”: A Research Impact Evaluation at a Regional Australian Hospital and Health Service

**Journal name:** International Journal of Health Policy and Management (IJHPM)

**Authors’ information:** Amy Brown<sup>1¶\*</sup>, Alexandra Edelman<sup>1,2¶</sup>, Tilley Pain<sup>1,2</sup>, Sarah Larkins<sup>2</sup>, Gillian Harvey<sup>3</sup>

<sup>1</sup>Townsville Hospital and Health Service, Townsville, QLD, Australia.

<sup>2</sup>James Cook University, Townsville, QLD, Australia.

<sup>3</sup>Flinders University, Adelaide, SA, Australia.

(\*Corresponding author: Email: [amy.brown@health.qld.gov.au](mailto:amy.brown@health.qld.gov.au))

¶Both authors contributed equally to this paper

**Supplementary file 1.** Interview Guide

*Abbreviations:*

ABF: Activity Based Funding; HDR: Higher Degree Research; JCU: James Cook University; QH: Queensland Health; THHS: Townsville Hospital and Health Service

| Impact type/contextual factor                            | Issue to explore                                                                                                                                    | Possible questions                                                                                                                                                                                                                                                                                                                                                                                                                                                                                                                                                                                                                                                                                                                             |
|----------------------------------------------------------|-----------------------------------------------------------------------------------------------------------------------------------------------------|------------------------------------------------------------------------------------------------------------------------------------------------------------------------------------------------------------------------------------------------------------------------------------------------------------------------------------------------------------------------------------------------------------------------------------------------------------------------------------------------------------------------------------------------------------------------------------------------------------------------------------------------------------------------------------------------------------------------------------------------|
|                                                          | Introduction                                                                                                                                        | What is your current/former roles at THHS?                                                                                                                                                                                                                                                                                                                                                                                                                                                                                                                                                                                                                                                                                                     |
| Impact - Research activity                               | Types of research/ quantity                                                                                                                         | What sort of research do you do?<br>How many research projects have you been involved in over 10 years?<br>(How many student projects (including Honours and PhD or Masters projects) have occurred within your department over 10 years?<br>How many research projects have occurred within your department over 10 years?<br>What types of research are being done in your area?)                                                                                                                                                                                                                                                                                                                                                            |
| Impact - Research capacity                               | How access to research supports influence career choices and progression<br>Training – benefits and challenges, implications for career progression | What supports are available to you to develop a research career?<br>Has support at THHS helped you access other (external) sources of support? How? Examples?<br>What research training options are available to you?<br>What else is necessary in addition to education and training to become a clinician researcher? Is THHS providing this support?                                                                                                                                                                                                                                                                                                                                                                                        |
| Impact - Clinical practice change                        | Support for clinical/policy impact<br>How research is integrated into day-to-day practice<br>Examples of successes/failures                         | <b>Can you give a specific example where a research project has led to a change in clinical practice or service provision?</b><br><b>What did this change look like?</b><br><b>Can you describe how you think this change came about?</b><br><b>How long has this change in practice been sustained?</b><br><b>Were there any factors that enabled this change to occur? What were they?</b><br><b>Were there any factors that hindered the change? What were they?</b><br><b>Was this experience shared with others? How?</b><br><b>How has THHS as an organisation facilitated this type of research to this point?</b><br><b>What would you like to see more/less of?</b><br><b>What do you think could improve this process next time?</b> |
| Impact - Clinical workforce change                       | Workforce more clinically capable<br>Greater recruitment                                                                                            | Have you noticed any changes to your practice capabilities because of your research capability?<br>(Do you notice any changes in your colleagues/staff capabilities as a result of their research involvement?)<br>Has research activity helped with recruitment and retention of clinicians? Can you give examples?                                                                                                                                                                                                                                                                                                                                                                                                                           |
| Impact - Improved patient and population health          | Reported health outcome impacts                                                                                                                     | Can you give a specific example where a research project has led to patient/population health improvements?<br>How was this measured/assessed?                                                                                                                                                                                                                                                                                                                                                                                                                                                                                                                                                                                                 |
| Contextual factor - Interests, motivations and attitudes | Drivers of research aspiration/engagement (or lack thereof)                                                                                         | What drove your interest in research? / Are you interested in being involved in research?<br>What are your main motivations for engaging in research?                                                                                                                                                                                                                                                                                                                                                                                                                                                                                                                                                                                          |

*Abbreviations:*

ABF: Activity Based Funding; HDR: Higher Degree Research; JCU: James Cook University; QH: Queensland Health; THHS: Townsville Hospital and Health Service

**“We’re Not Providing the Best Care If We Are Not on the Cutting Edge of Research”: A Research Impact Evaluation at a Regional Australian Hospital and Health Service**  
10.34172/ijhpm.2022.6529

| <b>Impact type/contextual factor</b>                                            | <b>Issue to explore</b>                                                                         | <b>Possible questions</b>                                                                                                                                                                                                                                                                                                                                                                                                                                                        |
|---------------------------------------------------------------------------------|-------------------------------------------------------------------------------------------------|----------------------------------------------------------------------------------------------------------------------------------------------------------------------------------------------------------------------------------------------------------------------------------------------------------------------------------------------------------------------------------------------------------------------------------------------------------------------------------|
|                                                                                 | What motivates/doesn't motivate<br>Learning requirements                                        | How do you see yourself achieving your research aspirations?                                                                                                                                                                                                                                                                                                                                                                                                                     |
| Contextual factor - Visible signals of research value and valued research types | How research is promoted<br>How research is monitored/evaluated<br>How clinicians react to this | How is research promoted in THHS?<br>How is research evaluated/monitored in THHS?<br>How does THHS show it values research?<br>Do these signals have an impact on your current engagement with research? (or on your thoughts about engaging or not engaging in research in the future?) How?                                                                                                                                                                                    |
| Contextual factor - Characteristics of clinical role                            | Barriers/enablers to being involved in research relating to clinical role                       | What are the main enablers and barriers to engaging in research?<br>How do you balance clinical/research work?<br>Are there any requirements for you to be involved in research (e.g. industrial agreements, colleges)? How are these requirements met?<br>(How do you help your staff to balance clinical/research work?)                                                                                                                                                       |
| Contextual factor – research culture and inter-disciplinary collaboration       | What sort of culture/way of working promotes implementation of research to practice             | Is there a particular culture/way of working that facilitates clinical/policy impacts from research?                                                                                                                                                                                                                                                                                                                                                                             |
| Contextual factor – Leaders' understanding of research                          | How the leadership at THHS facilitates/inhibits clinical impacts                                | Does the leadership at THHS understand research?<br>What effect does this have on research and research implementation/translation at the health service?                                                                                                                                                                                                                                                                                                                        |
| Contextual factor - Responsiveness to patient and population health concerns    | How research prioritised<br>How research fits with strategic vision of THHS                     | How did you choose your research field/topics?<br>How does your research fit with colleagues' research and with broader program of research at THHS?<br>How does your research map with patient/population health needs and priorities?<br>What role did THHS have in driving your research focus?<br>What do you think continued THHS support for research activity can or will achieve in the future?<br>What do you think the goals of this support and investment should be? |
| Contextual factor - Reporting and funding structures                            | How ABF model and reporting requirements to QH affect the research effort at THHS               | How do you balance health system performance drivers with research aspirations and requirements?<br>How does this influence your support for research?                                                                                                                                                                                                                                                                                                                           |

**Abbreviations:**

ABF: Activity Based Funding; HDR: Higher Degree Research; JCU: James Cook University; QH: Queensland Health; THHS: Townsville Hospital and Health Service
